# Supplementary material
Source: PubMed Central journal article supplement (PMC8440496)
Supplement: NIHMS1713508-supplement-Supplemental_Tables.pdf [file NIHMS1713508-supplement-Supplemental_Tables.pdf]

**TABLE S1. ACB Score of Medications and Frequency**

| Medication                           | ACB Score | n   | Medication                         | ACB Score | n   |
|--------------------------------------|-----------|-----|------------------------------------|-----------|-----|
| <b>2nd-Generation Antipsychotics</b> |           |     | <b>Anticholinergics</b>            |           |     |
| Aripiprazole                         | 1         | 178 | Benzotropine                       | 3         | 152 |
| Asenapine                            | 1         | 4   | Diphenhydramine                    | 3         | 41  |
| Clozapine                            | 3         | 125 | Hydroxyzine                        | 3         | 30  |
| Iloperidone                          | 1         | 5   | Trihexyphenidyl                    | 3         | 22  |
| Lurasidone <sup>#</sup>              | 1         | 14  | <b>Mood Stabilizers</b>            |           |     |
| Olanzapine                           | 3         | 166 | Carbamazepine                      | 2         | 13  |
| Paliperidone                         | 1         | 15  | Gabapentin                         | 0         | 25  |
| Paliperidone LAI                     | 1         | 15  | Lamotrigine                        | 0         | 21  |
| Quetiapine                           | 3         | 173 | Lithium                            | 0         | 35  |
| Risperidone                          | 1         | 267 | Oxcarbazepine <sup>#</sup>         | 2         | 10  |
| Risperidone LAI                      | 1         | 14  | Topiramate                         | 0         | 15  |
| Ziprasidone <sup>#</sup>             | 1         | 91  | Valproic Acid <sup>#</sup>         | 1         | 122 |
| <b>1st-Generation Antipsychotics</b> |           |     | <b>Benzodiazepines</b>             |           |     |
| Chlorpromazine                       | 3         | 13  | Alprazolam <sup>#</sup>            | 1         | 5   |
| Fluphenazine <sup>#</sup>            | 3         | 35  | Clonazepam <sup>#</sup>            | 1         | 59  |
| Fluphenazine LAI                     | 3         | 14  | Clorazepate <sup>#</sup>           | 1         | 1   |
| Haloperidol                          | 1         | 68  | Diazepam                           | 1         | 11  |
| Haloperidol LAI                      | 1         | 14  | Flurazepam <sup>#</sup>            | 1         | 2   |
| Loxapine                             | 2         | 10  | Lorazepam <sup>#</sup>             | 1         | 47  |
| Perphenazine                         | 3         | 22  | Oxazepam <sup>#</sup>              | 1         | 1   |
| Prochlorperazine <sup>#</sup>        | 2         | 2   | Temazepam <sup>#</sup>             | 1         | 10  |
| Thioridazine                         | 3         | 3   | <b>Other Anxiolytics/Sedatives</b> |           |     |
| Thiothixene <sup>#</sup>             | 2         | 4   | Zolpidem <sup>#</sup>              | 1         | 45  |
| Trifluoperazine                      | 3         | 8   | Buspirone                          | 0         | 27  |
| <b>Antidepressants</b>               |           |     | <b>Others</b>                      |           |     |
| Amitriptyline                        | 3         | 4   | Melatonin                          | 0         | 1   |
| Bupropion                            | 1         | 50  | Propranolol                        | 0         | 3   |
| Citalopram <sup>#</sup>              | 1         | 47  | St. John's Wort                    | 0         | 1   |
| Clomipramine                         | 3         | 6   |                                    |           |     |
| Doxepin                              | 3         | 6   |                                    |           |     |
| Duloxetine <sup>#</sup>              | 1         | 18  |                                    |           |     |
| Escitalopram <sup>#</sup>            | 1         | 33  |                                    |           |     |
| Fluoxetine <sup>#</sup>              | 1         | 58  |                                    |           |     |
| Fluvoxamine                          | 1         | 7   |                                    |           |     |
| Mirtazapine <sup>#</sup>             | 1         | 21  |                                    |           |     |
| Nefazodone <sup>#</sup>              | 1         | 1   |                                    |           |     |
| Nortriptyline                        | 3         | 2   |                                    |           |     |
| Paroxetine                           | 3         | 25  |                                    |           |     |
| Sertraline <sup>#</sup>              | 1         | 72  |                                    |           |     |
| Trazodone                            | 1         | 100 |                                    |           |     |
| Venlafaxine                          | 1         | 25  |                                    |           |     |

Abbreviations: LAI, Long acting injection/depot formulation

<sup>#</sup> denotes values derived by consensus from other scales, or based on class/structural similarities to medications with published ACB values

**TABLE S2. Effects of ACB on non-PCNB assessments of cognition**

| Assessment                    | ACB = 0 |      |      | ACB = 1 or 2 |      |      | ACB = 3 or 4 |      |      | ACB = 5 or 6 |      |      | ACB > 6 |      |      | F    | p      |
|-------------------------------|---------|------|------|--------------|------|------|--------------|------|------|--------------|------|------|---------|------|------|------|--------|
|                               | n       | Mean | SD   | n            | Mean | SD   | n            | Mean | SD   | n            | Mean | SD   | n       | Mean | SD   |      |        |
| <b>CVLT List A</b>            |         |      |      |              |      |      |              |      |      |              |      |      |         |      |      |      |        |
| Trial 1                       | 71      | 5.4  | 1.9  | 296          | 4.9  | 1.8  | 340          | 4.6  | 1.9  | 177          | 4.4  | 1.7  | 192     | 3.9  | 1.8  | 12.6 | <0.001 |
| Trial 2                       | 71      | 7.8  | 2.9  | 296          | 6.9  | 2.5  | 340          | 6.6  | 2.4  | 177          | 6.5  | 2.3  | 192     | 5.8  | 2.3  | 10.6 | <0.001 |
| Trial 3                       | 71      | 9.1  | 3.2  | 296          | 8.0  | 2.7  | 340          | 7.8  | 2.7  | 177          | 7.6  | 2.7  | 192     | 6.9  | 2.6  | 10.0 | <0.001 |
| Trial 4                       | 71      | 9.6  | 3.4  | 296          | 8.9  | 2.9  | 340          | 8.5  | 3.0  | 177          | 8.5  | 2.8  | 192     | 7.9  | 2.9  | 5.3  | <0.001 |
| Trial 5                       | 71      | 10.6 | 3.1  | 296          | 9.4  | 3.0  | 340          | 9.2  | 2.9  | 177          | 9.2  | 3.1  | 192     | 8.2  | 2.9  | 10.1 | <0.001 |
| <b>Total</b>                  | 71      | 42.5 | 12.8 | 296          | 38.1 | 11.3 | 340          | 36.7 | 11.5 | 177          | 36.2 | 11.2 | 192     | 32.7 | 10.9 | 11.6 | <0.001 |
| <b>CVLT List B</b>            | 71      | 4.8  | 2.1  | 296          | 3.9  | 1.8  | 340          | 3.8  | 1.7  | 177          | 3.6  | 1.7  | 192     | 3.2  | 1.6  | 12.2 | <0.001 |
| <b>CVLT Short Delay</b>       |         |      |      |              |      |      |              |      |      |              |      |      |         |      |      |      |        |
| Free Recall                   | 71      | 9.0  | 3.4  | 296          | 7.5  | 3.3  | 340          | 7.1  | 3.4  | 177          | 7.2  | 3.1  | 192     | 6.4  | 3.2  | 9.1  | <0.001 |
| Cued Recall                   | 71      | 10.2 | 3.0  | 296          | 8.6  | 3.1  | 340          | 8.5  | 3.2  | 177          | 8.3  | 3.0  | 192     | 7.7  | 3.2  | 8.7  | <0.001 |
| <b>CVLT Long Delay</b>        |         |      |      |              |      |      |              |      |      |              |      |      |         |      |      |      |        |
| Free Recall                   | 71      | 9.2  | 3.8  | 296          | 7.9  | 3.4  | 340          | 7.4  | 3.5  | 177          | 7.2  | 3.4  | 192     | 6.6  | 3.4  | 9.2  | <0.001 |
| Cued Recall                   | 71      | 10.2 | 3.4  | 296          | 8.6  | 3.4  | 340          | 8.3  | 3.3  | 177          | 8.2  | 3.2  | 192     | 7.4  | 3.3  | 10.3 | <0.001 |
| <b>CPT</b>                    |         |      |      |              |      |      |              |      |      |              |      |      |         |      |      |      |        |
| Identical pairs, 3 digits     | 71      | 2.5  | 1.0  | 285          | 2.2  | 1.0  | 315          | 2.1  | 1.1  | 159          | 2.1  | 1.0  | 158     | 1.8  | 0.8  | 6.4  | <0.001 |
| Identical pairs, 4 digits     | 71      | 1.3  | 0.8  | 278          | 1.3  | 0.8  | 304          | 1.2  | 0.8  | 157          | 1.1  | 0.7  | 153     | 0.9  | 0.6  | 6.3  | <0.001 |
| Degraded Stimulus             | 67      | 2.0  | 1.2  | 276          | 1.6  | 1.0  | 298          | 1.7  | 1.1  | 158          | 1.7  | 1.0  | 169     | 1.6  | 1.0  | 2.1  | 0.08   |
| <b>Letter-Number Sequence</b> |         |      |      |              |      |      |              |      |      |              |      |      |         |      |      |      |        |
| Forward                       | 73      | 12.2 | 2.6  | 305          | 11.3 | 2.7  | 340          | 11.4 | 2.9  | 177          | 11.3 | 2.9  | 197     | 10.6 | 2.4  | 4.9  | <0.001 |
| Reorder                       | 73      | 9.2  | 2.6  | 304          | 8.2  | 2.7  | 340          | 8.1  | 2.7  | 177          | 8.1  | 2.7  | 195     | 7.1  | 2.5  | 10   | <0.001 |

Abbreviations: CVLT, California Verbal Learning Test; CPT, Continuous Performance Test

**TABLE S3. Effects of Demographic and Clinical Factors on ACB x PCNB Domain Interaction**

| PCNB Domain               | No Covariates |        | CPZE  |        | No. of Antipsychotics |        | SAPS  |        | SANS  |        | Duration of Illness |        | Age   |        | No. of Hospitalizations |        | Cigarettes/day |        |
|---------------------------|---------------|--------|-------|--------|-----------------------|--------|-------|--------|-------|--------|---------------------|--------|-------|--------|-------------------------|--------|----------------|--------|
|                           | B             | p      | B     | p      | B                     | p      | B     | p      | B     | p      | B                   | p      | B     | p      | B                       | p      | B              | p      |
| <b>Abstraction</b>        | -0.07         | <0.001 | -0.06 | <0.001 | -0.06                 | <0.001 | -0.07 | <0.001 | -0.07 | <0.001 | -0.05               | <0.001 | -0.06 | <0.001 | -0.07                   | <0.001 | -0.06          | <0.001 |
| <b>Attention</b>          | -0.07         | <0.001 | -0.07 | <0.001 | -0.05                 | <0.001 | -0.07 | <0.001 | -0.06 | <0.001 | -0.06               | <0.001 | -0.06 | <0.001 | -0.07                   | <0.001 | -0.06          | <0.001 |
| <b>Working Memory</b>     | -0.06         | <0.001 | -0.05 | <0.001 | -0.04                 | <0.001 | -0.06 | <0.001 | -0.05 | <0.001 | -0.05               | <0.001 | -0.05 | <0.001 | -0.06                   | <0.001 | -0.05          | <0.001 |
| <b>Verbal Memory</b>      | -0.07         | <0.001 | -0.06 | <0.001 | -0.06                 | <0.001 | -0.06 | <0.001 | -0.06 | <0.001 | -0.05               | <0.001 | -0.06 | <0.001 | -0.07                   | <0.001 | -0.06          | <0.001 |
| <b>Face Memory</b>        | -0.06         | <0.001 | -0.06 | <0.001 | -0.06                 | <0.001 | -0.06 | <0.001 | -0.05 | <0.001 | -0.04               | <0.001 | -0.05 | <0.001 | -0.06                   | <0.001 | -0.05          | <0.001 |
| <b>Spatial Memory</b>     | -0.06         | <0.001 | -0.05 | <0.001 | -0.06                 | <0.001 | -0.06 | <0.001 | -0.05 | <0.001 | -0.05               | <0.001 | -0.05 | <0.001 | -0.06                   | <0.001 | -0.05          | <0.001 |
| <b>Spatial Ability</b>    | -0.05         | <0.001 | -0.06 | <0.001 | -0.06                 | <0.001 | -0.05 | <0.001 | -0.05 | <0.001 | -0.04               | <0.001 | -0.05 | <0.001 | -0.05                   | <0.001 | -0.05          | <0.001 |
| <b>Emotion Processing</b> | -0.08         | <0.001 | -0.07 | <0.001 | -0.06                 | <0.001 | -0.08 | <0.001 | -0.08 | <0.001 | -0.06               | <0.001 | -0.08 | <0.001 | -0.08                   | <0.001 | -0.07          | <0.001 |
| <b>Global Composite</b>   | -0.09         | <0.001 | -0.08 | <0.001 | -0.07                 | <0.001 | -0.08 | <0.001 | -0.08 | <0.001 | -0.07               | <0.001 | -0.08 | <0.001 | -0.09                   | <0.001 | -0.08          | <0.001 |

Abbreviations: CPZE, chlorpromazine equivalent; SAPS, Scale for the Assessment of Positive Symptoms; SANS, Scale for the Assessment of Negative Symptoms
